# Supplementary material for: Caveolin-1 Expression in the Dorsal Striatum Drives Methamphetamine Addiction-Like Behavior
Source: MDPI journal article supplement (doi:10.3390/ijms22158219), 2021-07-30
Supplement: s1 [file s1]

# **Caveolin-1 expression in the dorsal striatum drives methamphetamine addiction-like behavior**

Yosef Avchalumov<sup>1</sup>, Alison D. Kreisler<sup>1</sup>, Wulfran Trenet<sup>1</sup>, Mahasweta Nayak<sup>1</sup>, Brian P. Head<sup>1,2</sup>, Juan C. Piña-Crespo<sup>3</sup> and Chitra D. Mandyam<sup>1,2</sup>

## Supplementary figure S1

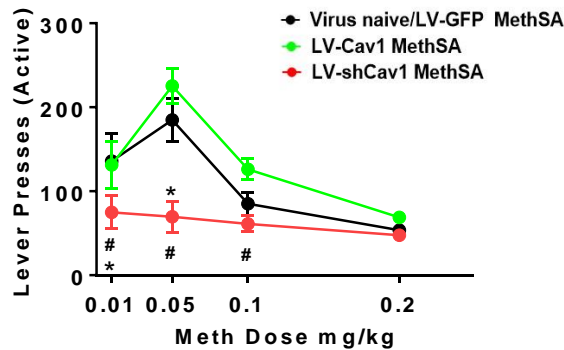

*Lever responses during dose-response in methamphetamine rats:* Two-way ANOVA of active lever responses showed that there was a significant treatment X dose interaction ( $F(6,117)=5.7$ ,  $p<0.0001$ ), main effect of dose ( $F(3,117)=31.9$ ,  $p<0.0001$ ) and main effect of treatment ( $F(2,39)=6.3$ ,  $p=0.004$ ). Posthoc analysis reflected that LV-shCav1 rats pressed the active lever fewer than LV-Cav1 rats at lower doses of meth (0.01, 0.05 and 0.1 mg/kg) but did not differ when responding for the higher dose (0.2 mg/kg). Similarly, posthoc analysis showed that LV-shCav1 rats pressed the active lever fewer than LV-GFP rats at lower doses of meth (0.01 and 0.05 mg/kg) but did not differ when responding for the higher dose (0.1 and 0.2 mg/kg).

## Supplementary figure S2

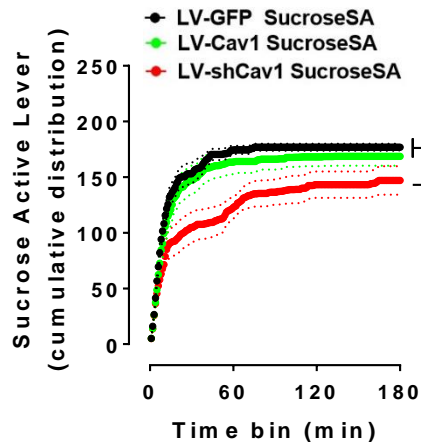

*Lever responses during PR session in sucrose rats:* Further analysis of active lever responses revealed significant group differences in the cumulative reinforced responses in which the LV-GFP (Kolmogorov-Smirnov  $D=0.88$ ,  $p<0.0001$ ), and LV-Cav1 rats (Kolmogorov-Smirnov  $D=0.84$ ,  $p<0.0001$ ) exhibited a steeper rise in lever responding than LV-shCav1 rats for sucrose reward.

## Supplementary figure S3

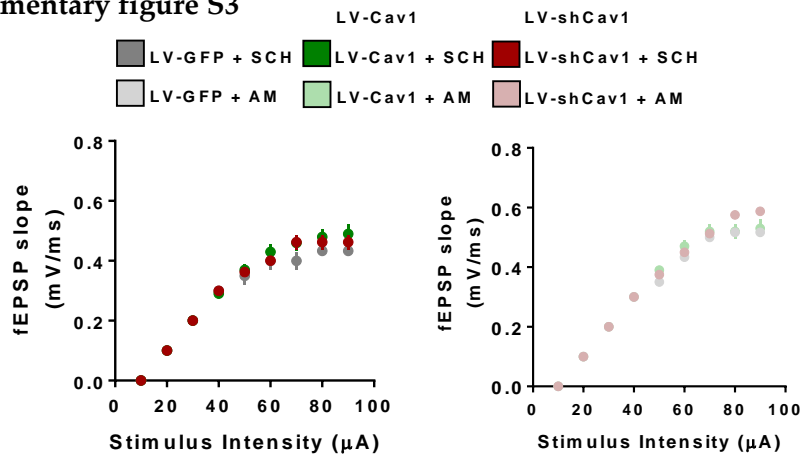

*I/O curves in virus injected methamphetamine naive rats under SCH23390 and AM251 conditions:* Repeated measures two-way ANOVA with stimulus intensity and virus treatment as independent variables and fEPSP slope as dependent variable did not detect a treatment x stimulus intensity interaction or main effect of treatment, however, detected a main effect of stimulus intensity under SCH23390 ( $F(8,81) = 238.2$ ,  $p < 0.0001$ ; left panel) and AM251 ( $F(8,81) = 177.8$ ,  $p < 0.0001$ ; right panel) conditions.

## Supplementary figure S4

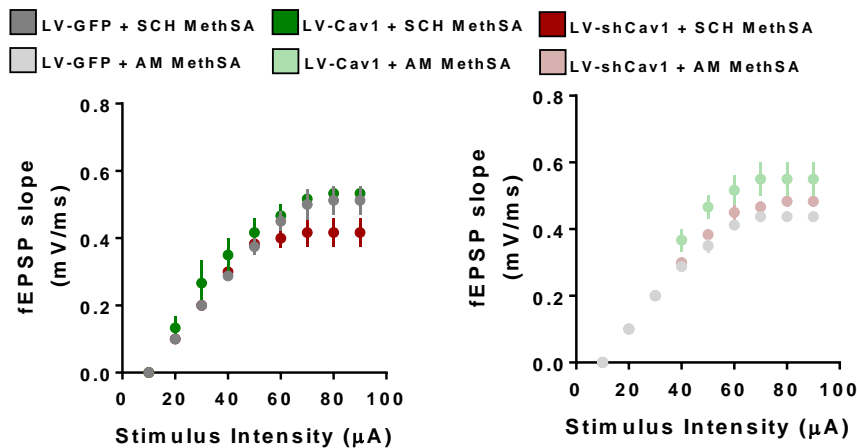

*I/O curves in virus injected methamphetamine rats under SCH23390 and AM251 conditions:* Repeated measures two-way ANOVA of I/O curves with stimulus intensity and virus treatment as independent variables and fEPSP slope as dependent variable were examined under SCH23390 and AM251 conditions: under SCH23390- a treatment x stimulus intensity interaction or main effect of treatment was not evident, however, a main effect of stimulus intensity ( $F(8,56) = 366.2$ ,  $p < 0.0001$ ; left panel) was detected; under AM251- a treatment x stimulus intensity interaction or main effect of treatment was not evident, however, a main effect of stimulus intensity ( $F(8,56) = 144$ ,  $p < 0.0001$ ; right panel) was detected.
